# Supplementary material for: Generation of Antigenic Diversity in Plasmodium falciparum by Structured Rearrangement of Var Genes During Mitosis
Source: PubMed Central journal article supplement (PMC4270465; doi:10.1371/journal.pgen.1004812), 2014-12-18

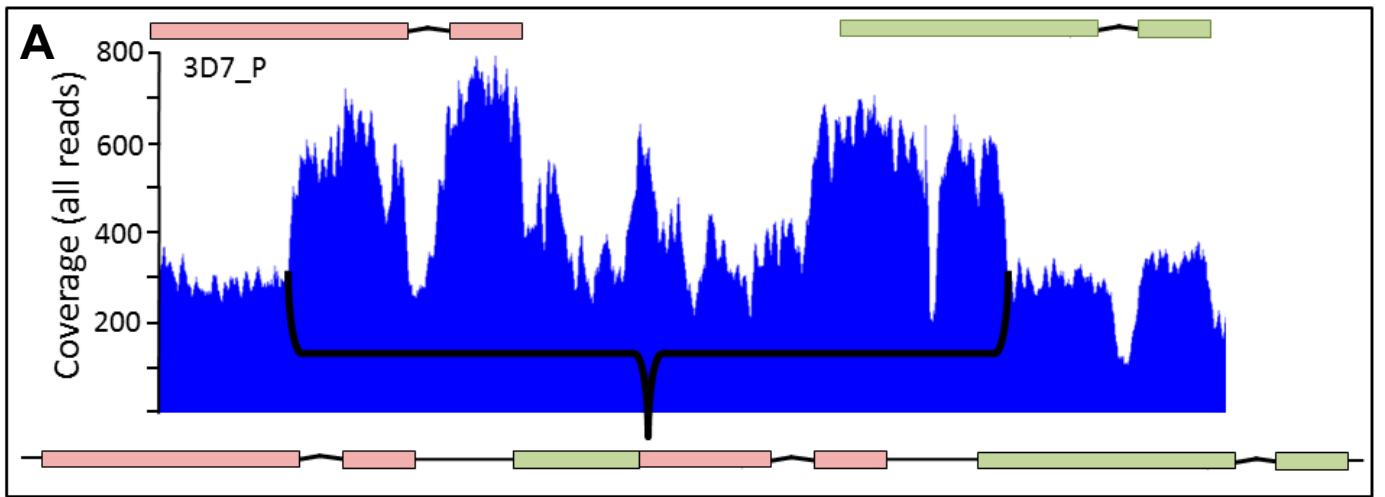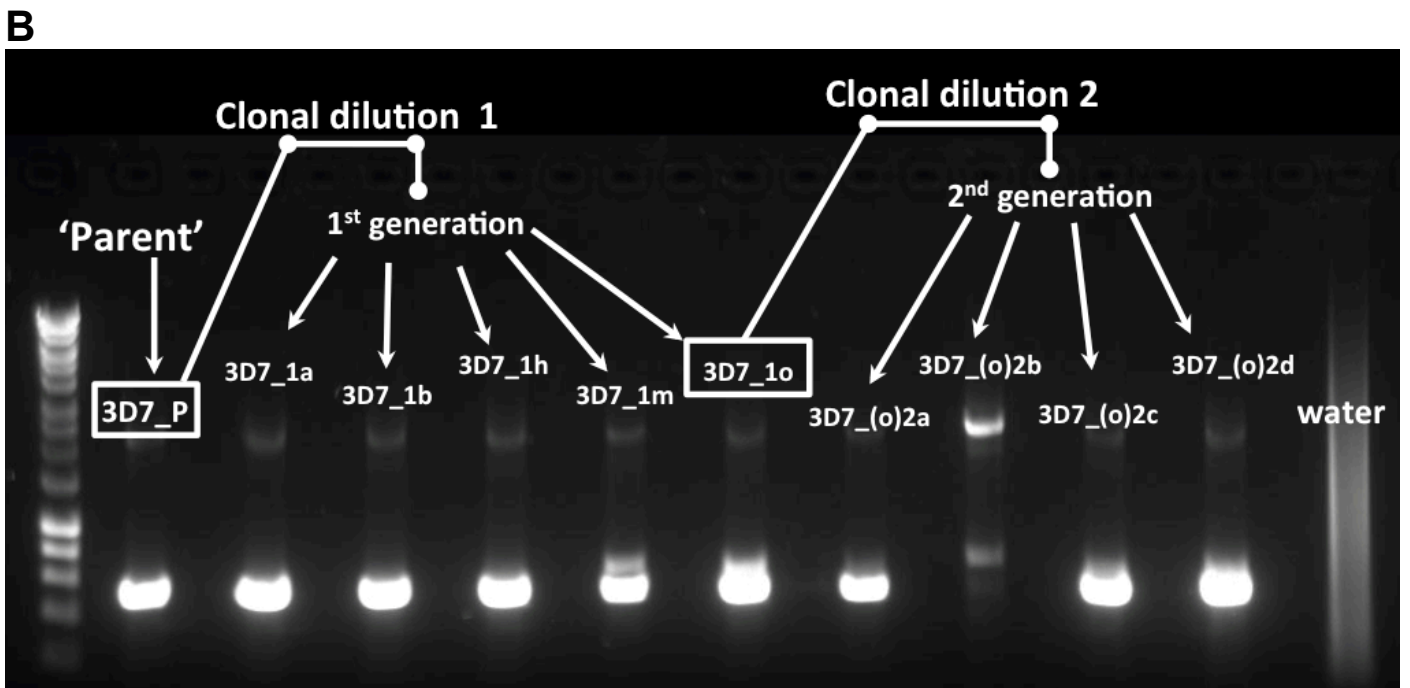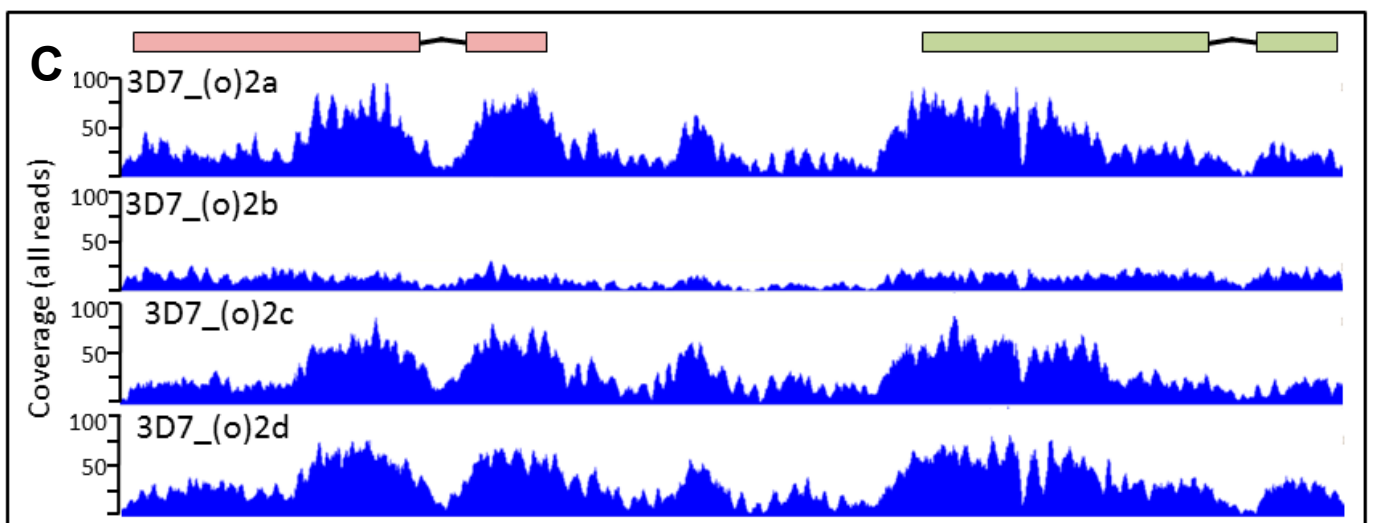

Supplement: pgen.1004812.s005.pdf [file pgen.1004812.s005.pdf]
