# Supplementary material for: Generation of Antigenic Diversity in Plasmodium falciparum by Structured Rearrangement of Var Genes During Mitosis
Source: PubMed Central journal article supplement (PMC4270465; doi:10.1371/journal.pgen.1004812), 2014-12-18

**A**

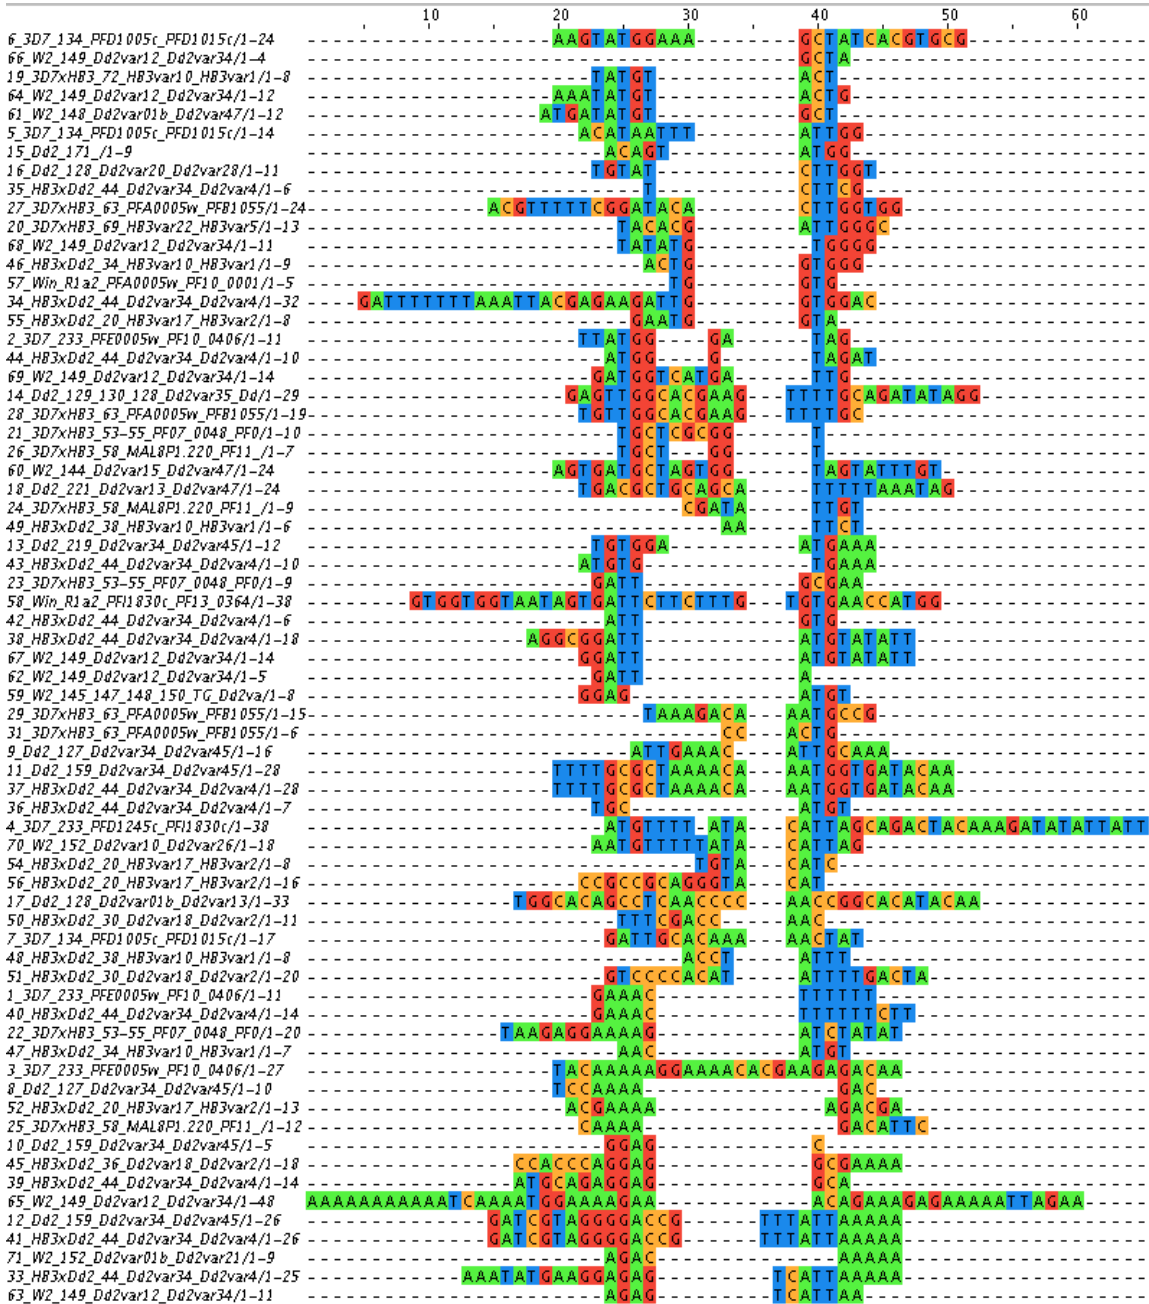

Consensus

-----A-----T-TTAAAAATGTAGGATA+T-ACATA-TTAAATTGAAAATCAA+AAA-----A-----

**B**

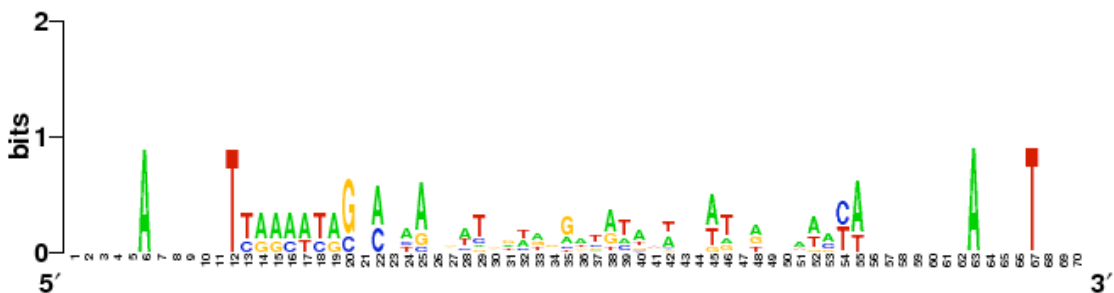

weblogo.berkeley.edu

**C**

## Motif Overview

---

### [Motif 1](#)

- 4.1e+011
- 57 sites

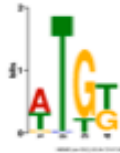

### [Motif 2](#)

- 3.3e+055
- 57 sites

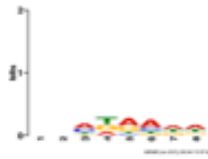

### [Motif 3](#)

- 3.7e+062
- 57 sites

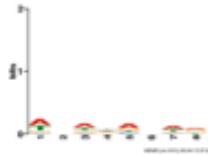

Supplement: pgen.1004812.s015.pdf [file pgen.1004812.s015.pdf]
